# Supplementary material for: Cloud water composition during HCCT-2010: Scavenging efficiencies, solute concentrations, and droplet size dependence of inorganic ions and dissolved organic carbon
Source: Copernicus journal article supplement (doi:10.5194/acp-16-3185-2016), 2016-03-10
Supplement: Supplementary file 1 [file acp-16-3185-2016-supplement.pdf]

Supplement of Atmos. Chem. Phys., 16, 3185–3205, 2016  
<http://www.atmos-chem-phys.net/16/3185/2016/>  
doi:10.5194/acp-16-3185-2016-supplement  
© Author(s) 2016. CC Attribution 3.0 License.

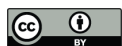

Atmospheric  
Chemistry  
and Physics  
Open Access  
EGU

*Supplement of*

## **Cloud water composition during HCCT-2010: Scavenging efficiencies, solute concentrations, and droplet size dependence of inorganic ions and dissolved organic carbon**

**Dominik van Pinxteren et al.**

*Correspondence to:* Hartmut Herrmann ([herrmann@tropos.de](mailto:herrmann@tropos.de))

The copyright of individual parts of the supplement might differ from the CC-BY 3.0 licence.

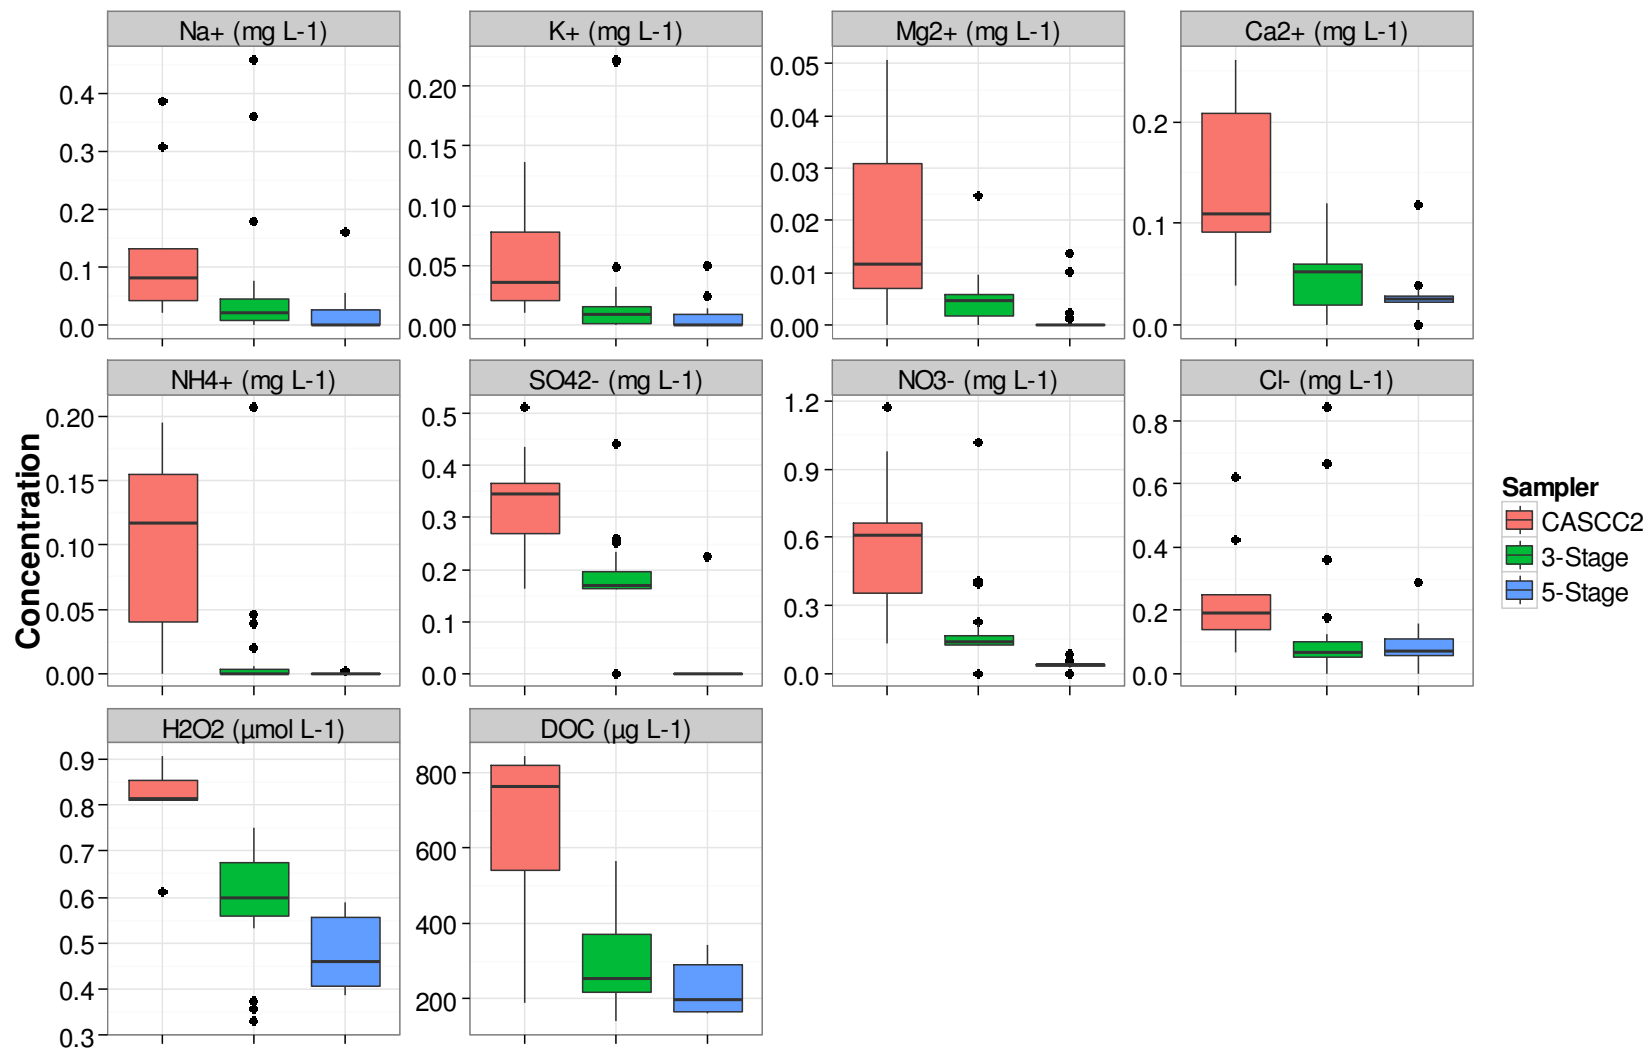

Figure S1: Box-plots of concentration levels of inorganic ions, H<sub>2</sub>O<sub>2</sub>, and DOC in control samples (‘blanks’) from 3 cloud water collectors.

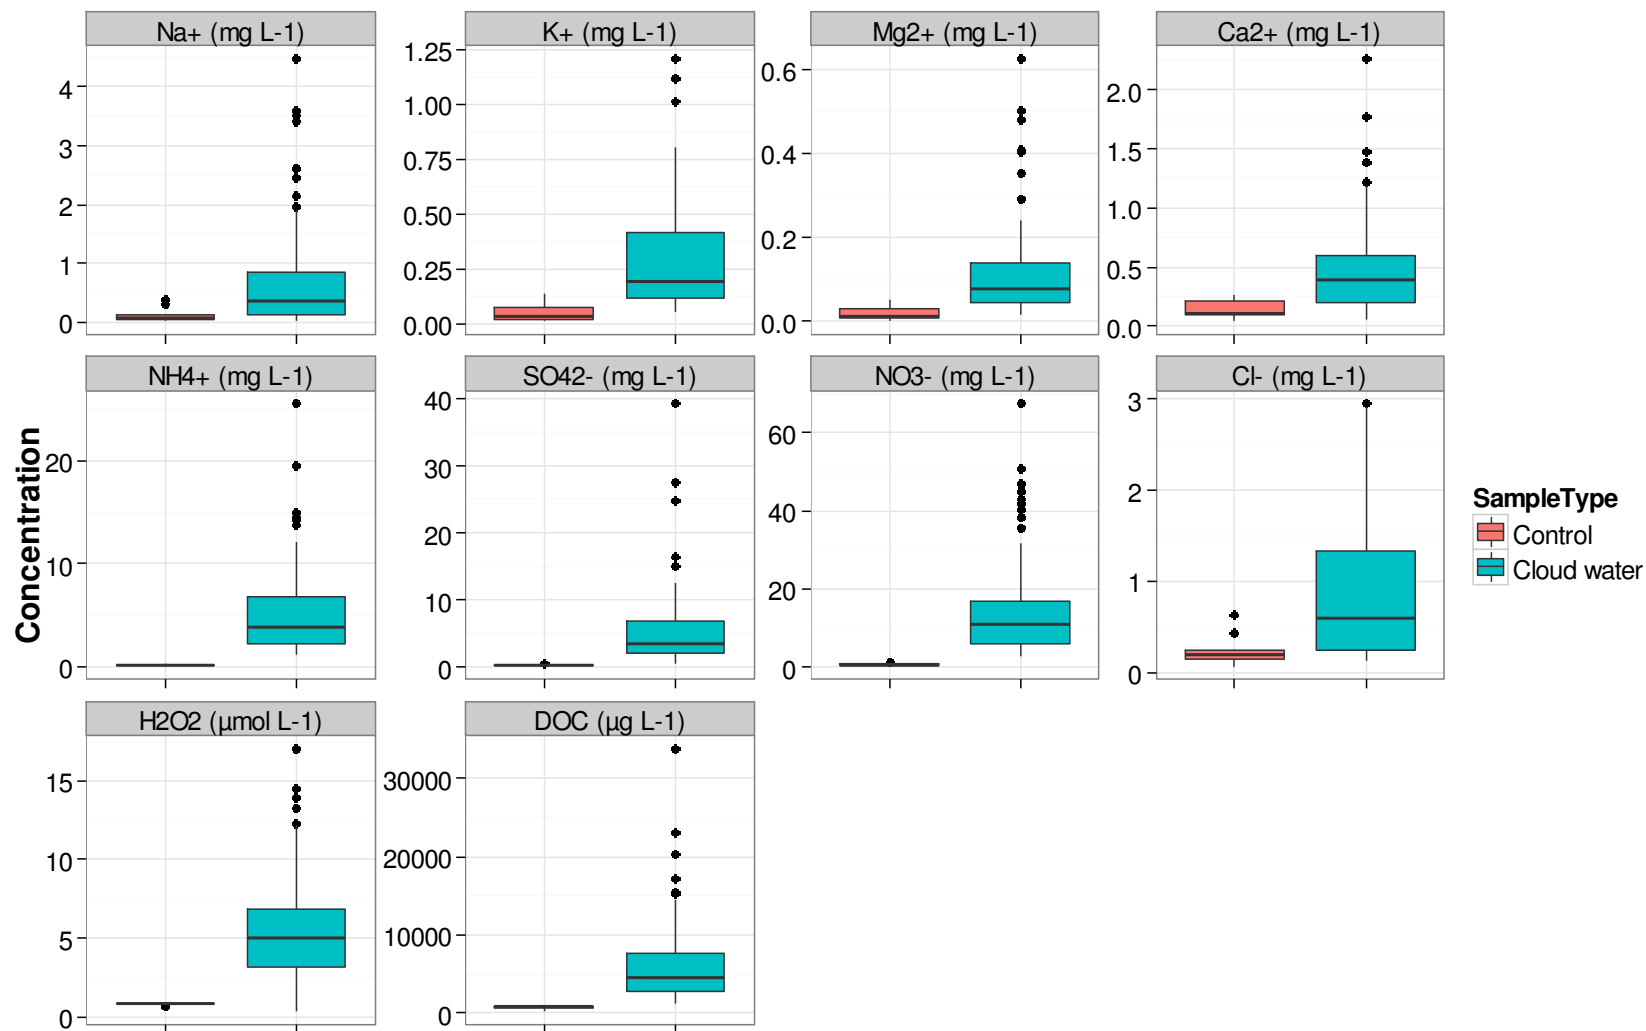

Figure S2: Box-plots of concentration levels of inorganic ions, H<sub>2</sub>O<sub>2</sub>, and DOC in control samples of bulk collector (CASCC2) and bulk cloud water samples.

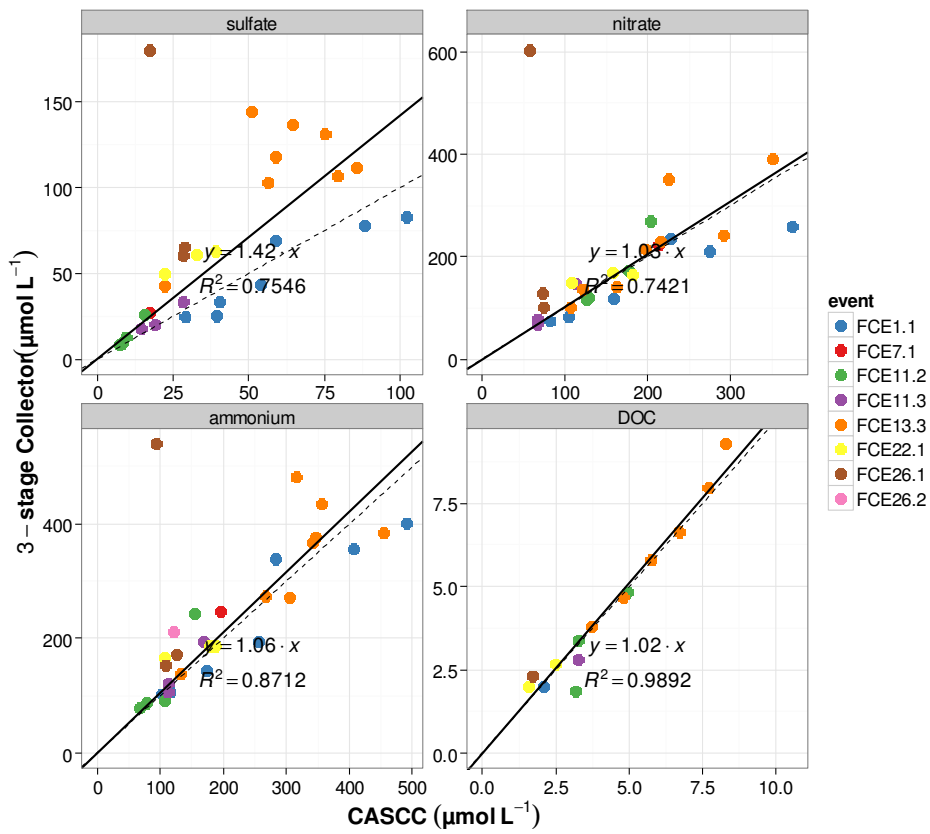

Figure S3: Comparison of solute concentrations of main cloud water constituents between bulk (CASCC) and 3-stage collector (volume-weighted means). Dashed line is 1:1.

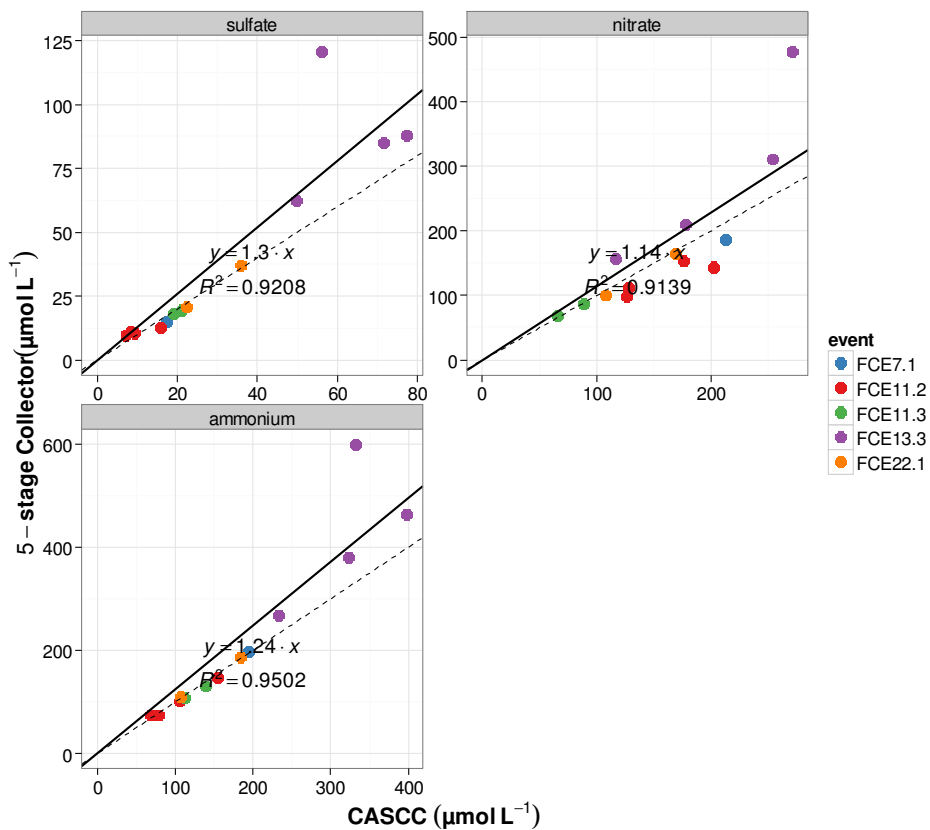

Figure S4: Comparison of solute concentrations of main cloud water constituents between bulk (CASCC) and 5-stage collector (volume-weighted means). Dashed line is 1:1. Note that DOC was not available for most of the 5-stage samples.

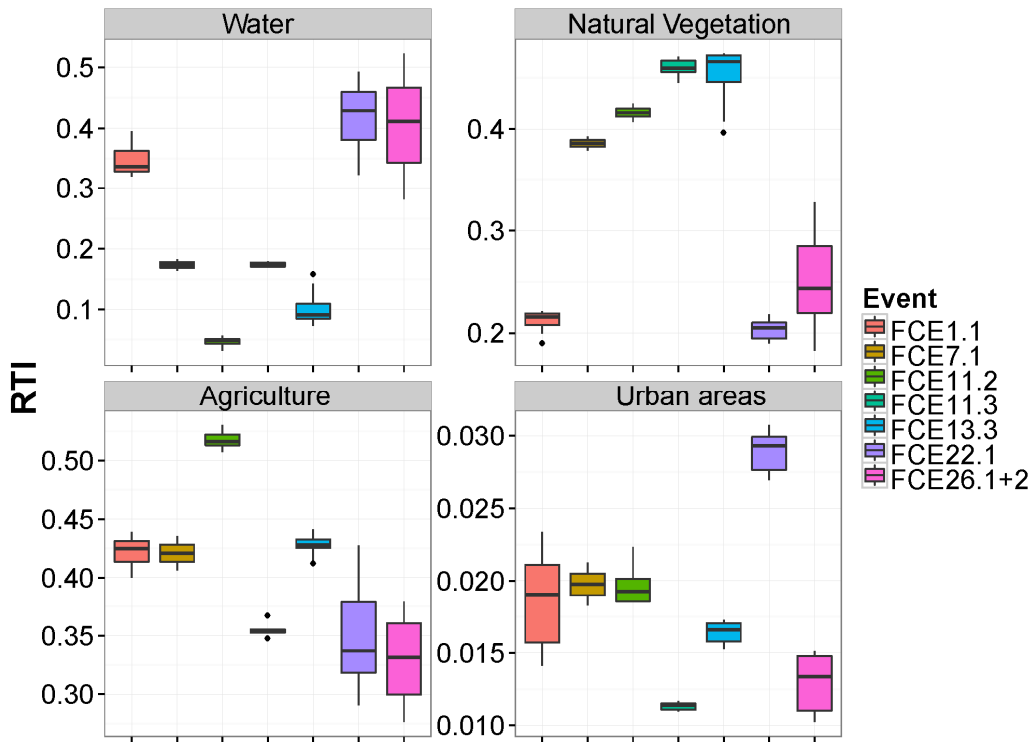

Figure S5: Box-plots of residence time indices (RTIs) for main land cover classes during cloud events.

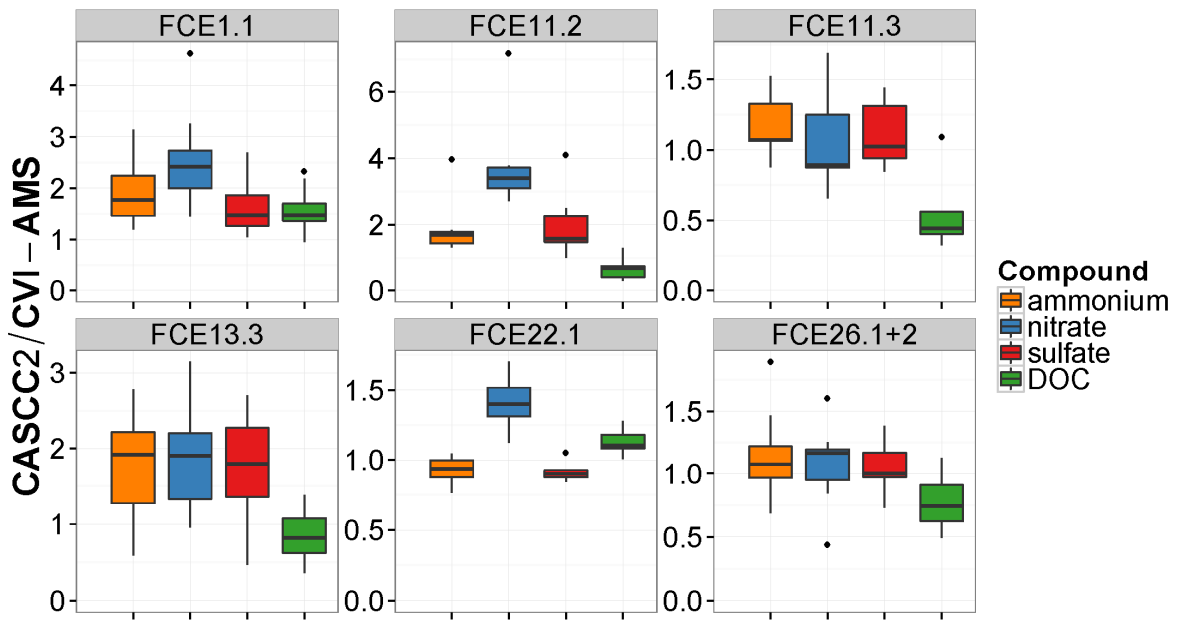

Figure S6: Box-plots of ratios between bulk (CASCC2) and residual particle (CVI-AMS) cloud water loadings for main cloud water constituents. DOC from CVI-AMS calculated as AMS organics divided by 1.8.

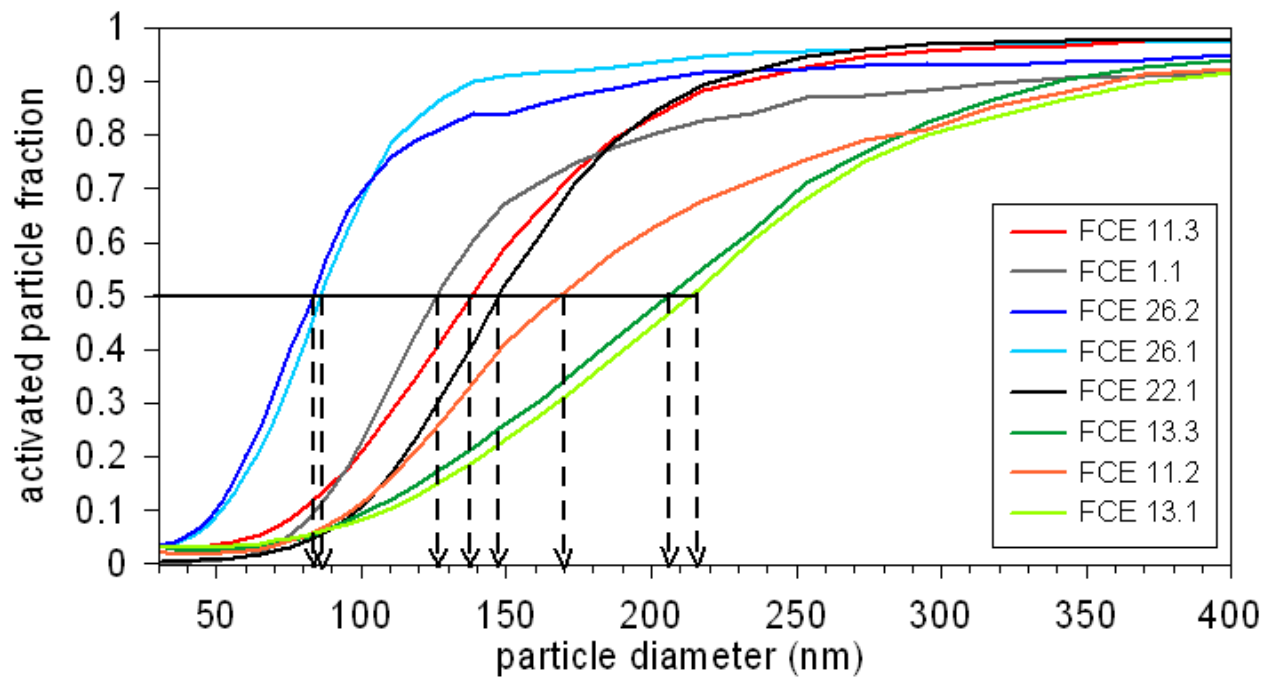

Figure S7: Particle activation curves derived from particle number size distributions of residual particles (CVI inlet) and interstitial particles (INT inlet).

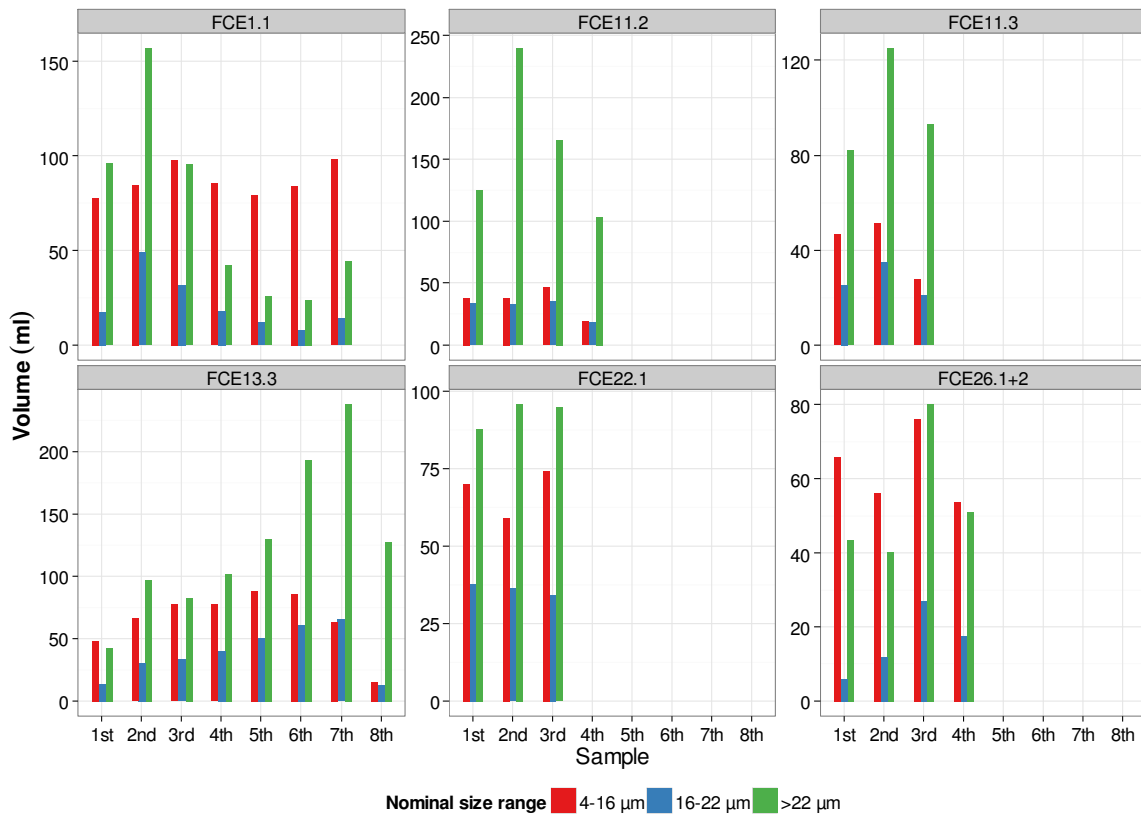

Figure S8: Sampled volumes of cloud water per stage of the 3-stage collector for individual samples.



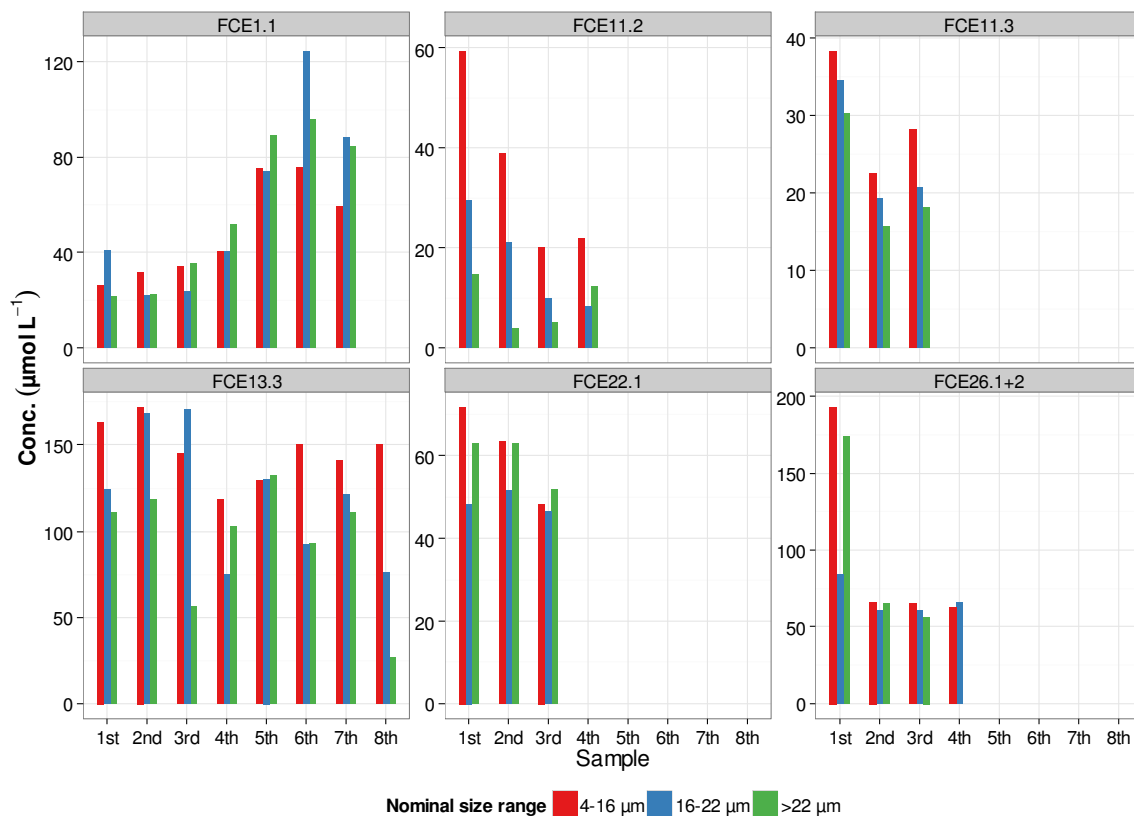

Figure S9: Size-resolved concentrations of sulfate for individual samples from 3-stage cloud water collector.

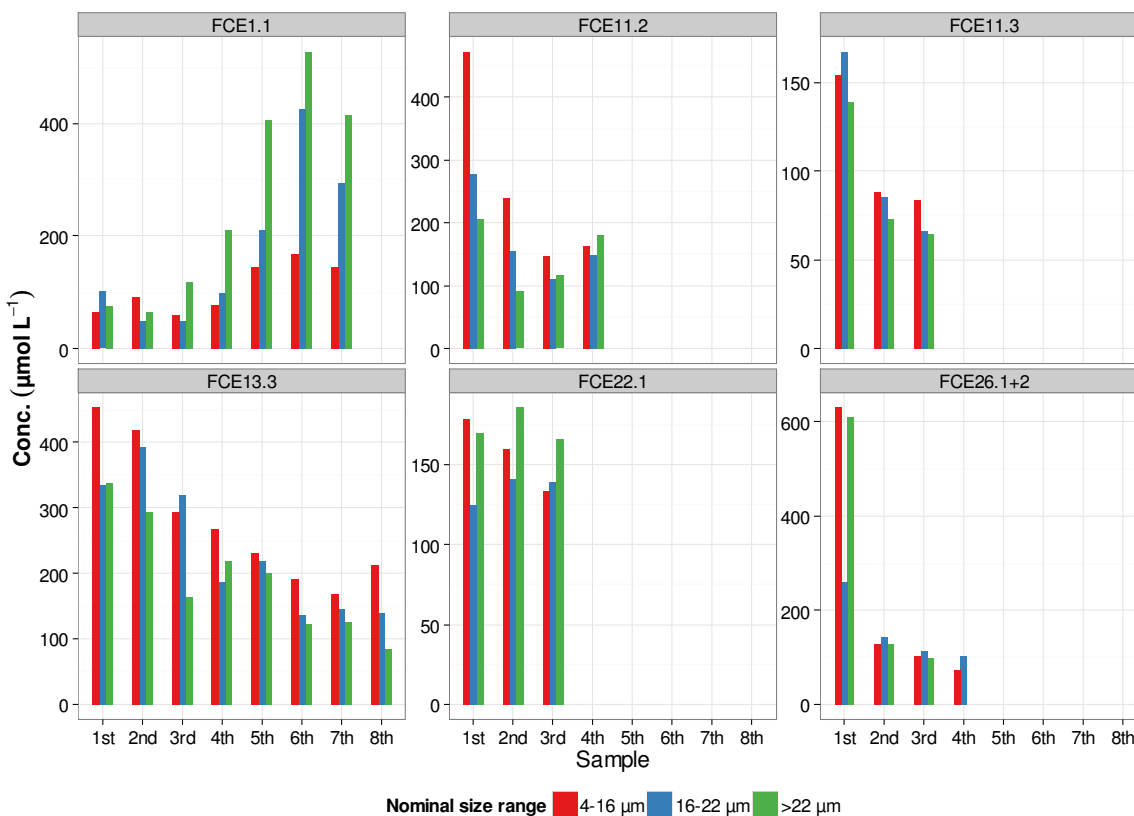

Figure S10: Size-resolved concentrations of nitrate for individual samples from 3-stage cloud water collector.

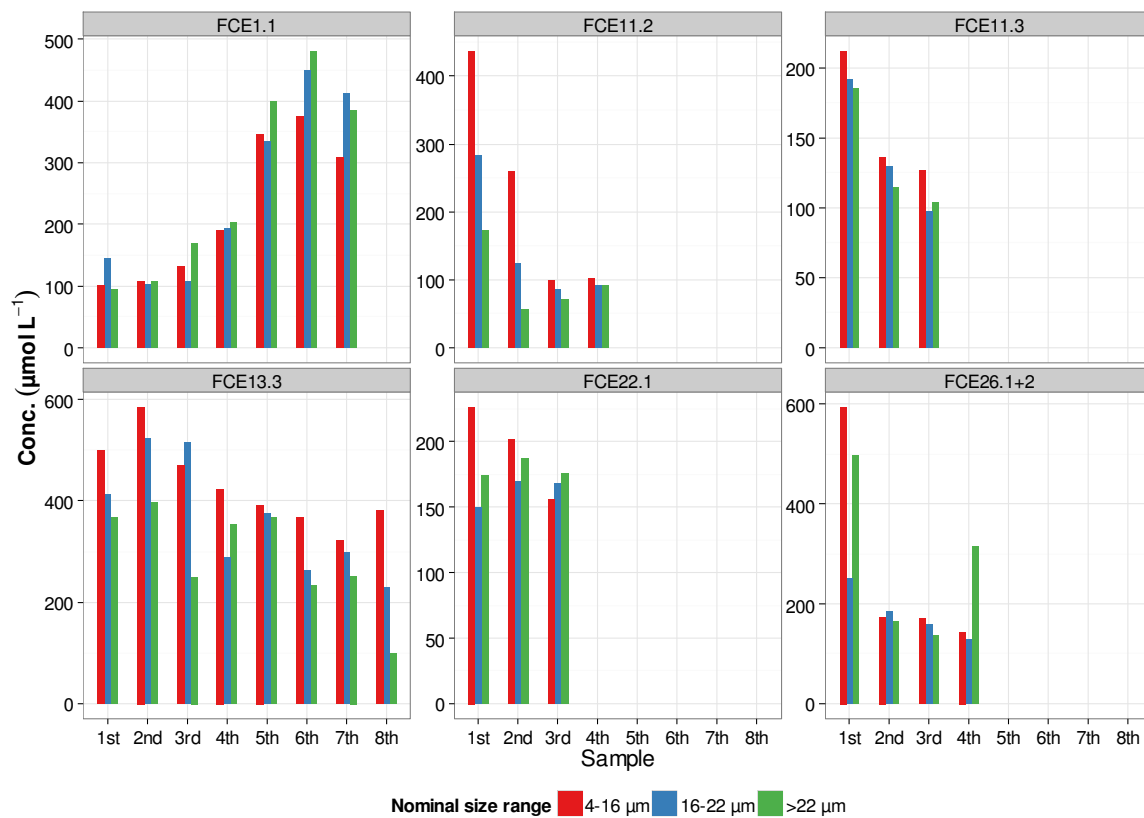

**Figure S11: Size-resolved concentrations of ammonium for individual samples from 3-stage cloud water collector.**

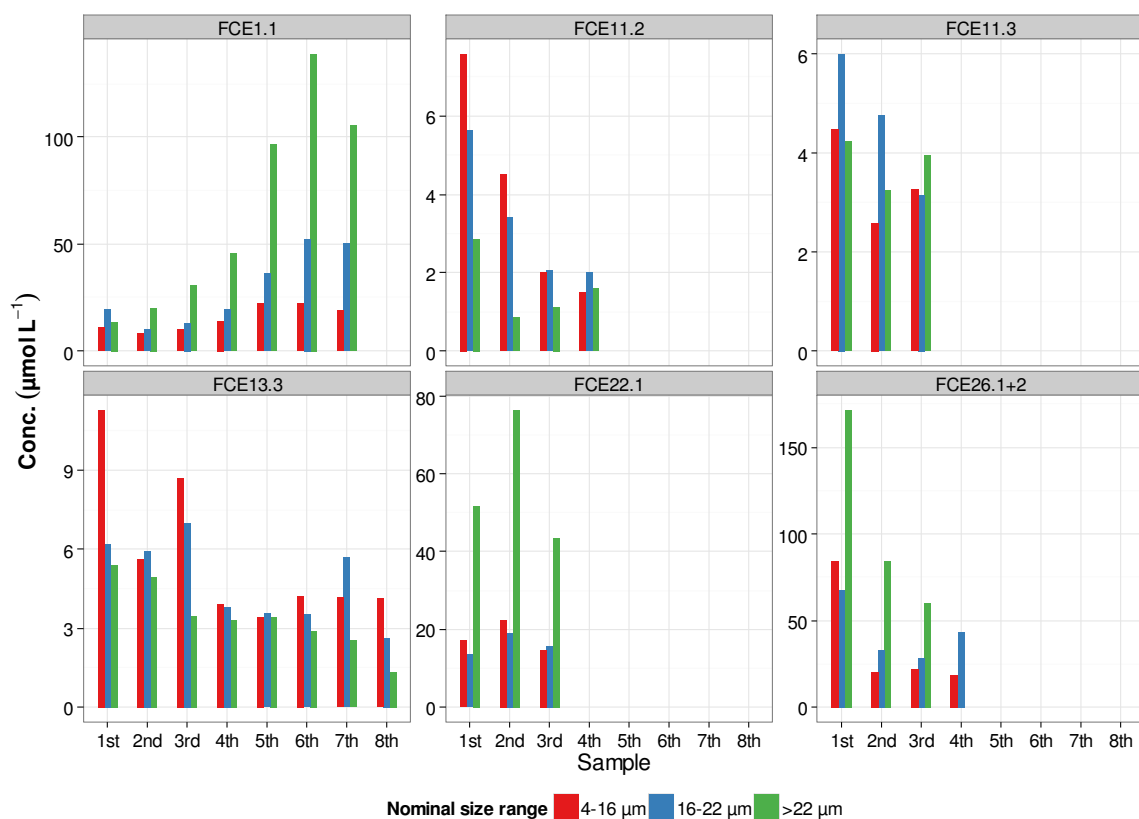

**Figure S12: Size-resolved concentrations of chloride for individual samples from 3-stage cloud water collector.**

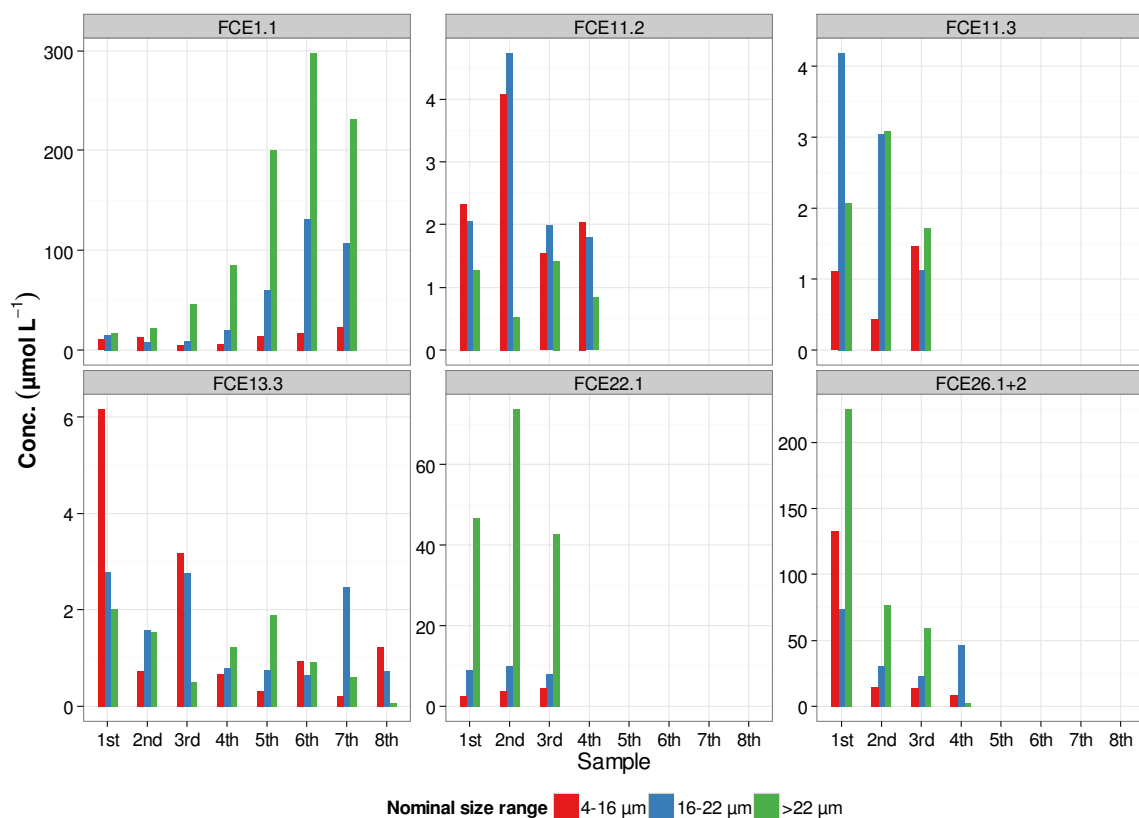

**Figure S13: Size-resolved concentrations of sodium for individual samples from 3-stage cloud water collector.**

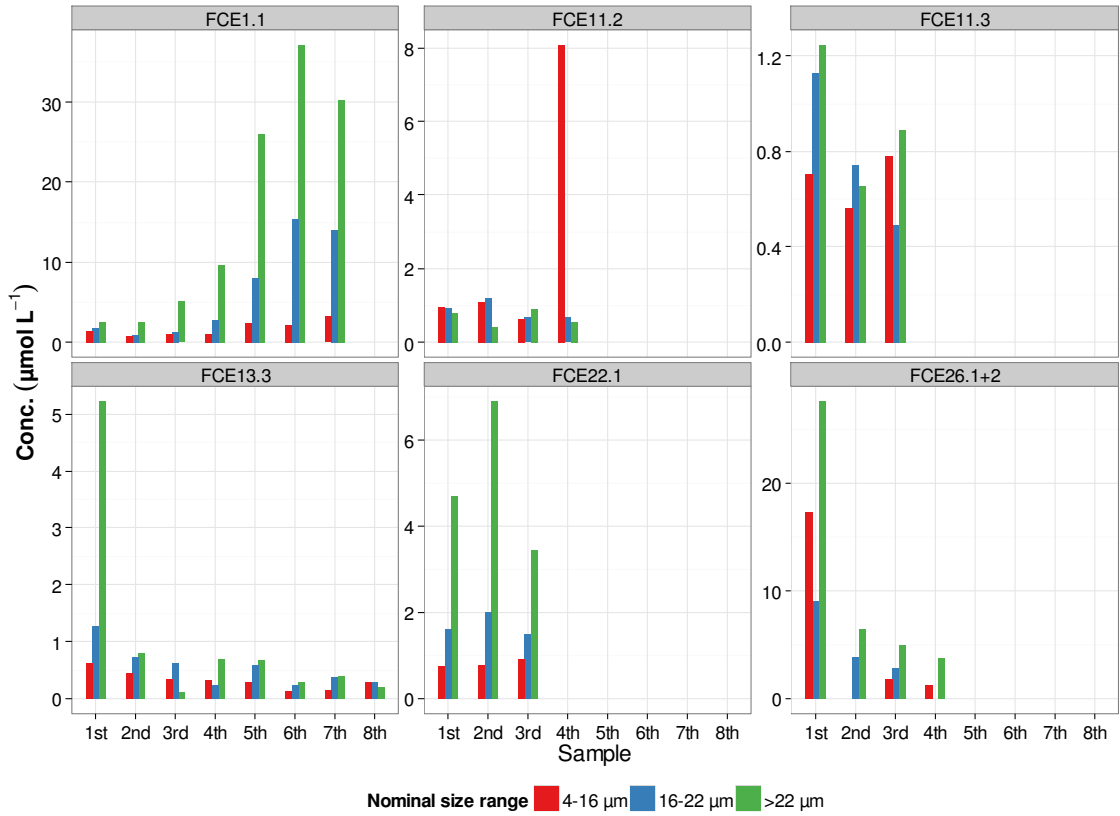

Figure S14: Size-resolved concentrations of magnesium for individual samples from 3-stage cloud water collector.

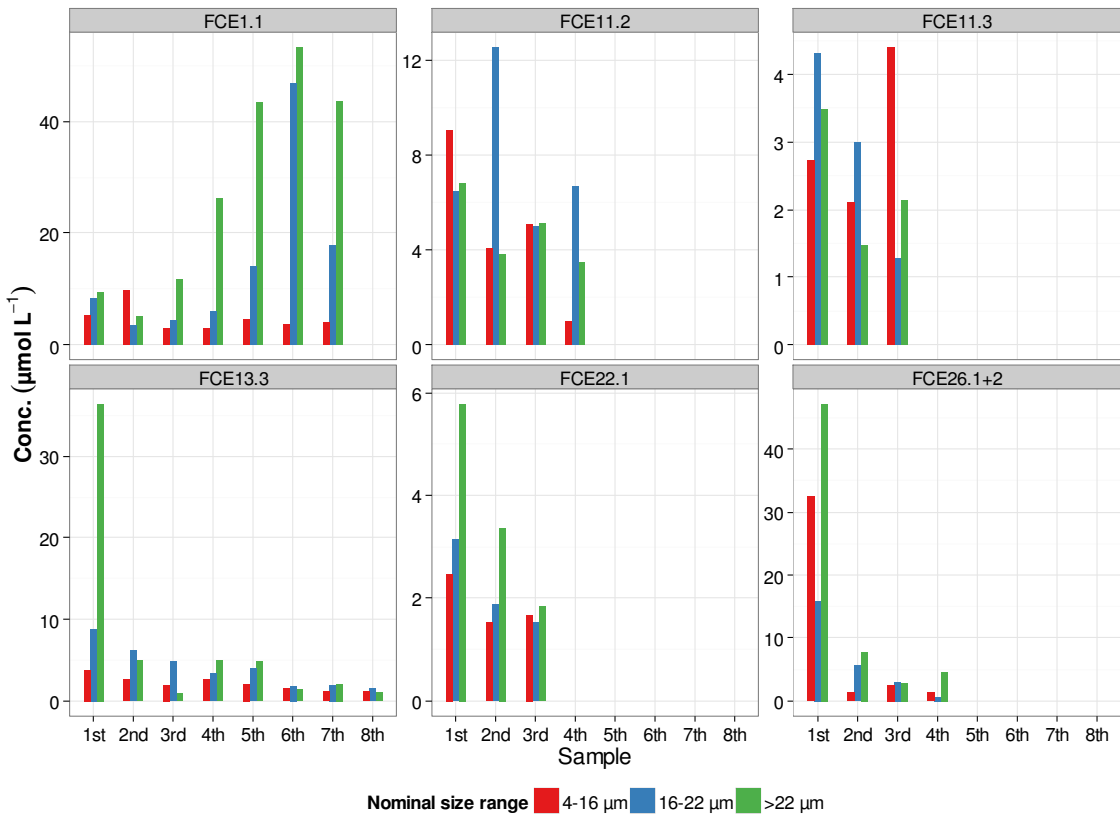

Figure S15: Size-resolved concentrations of calcium for individual samples from 3-stage cloud water collector.

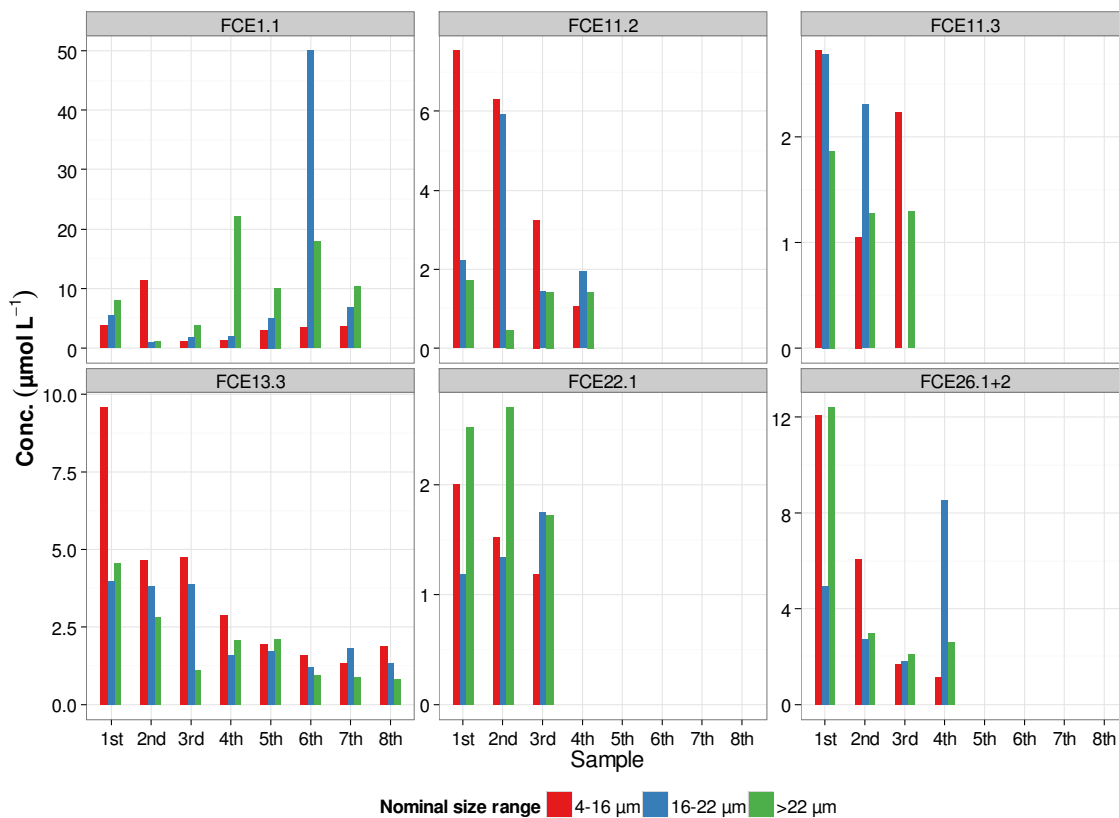

Figure S16: Size-resolved concentrations of potassium for individual samples from 3-stage cloud water collector.

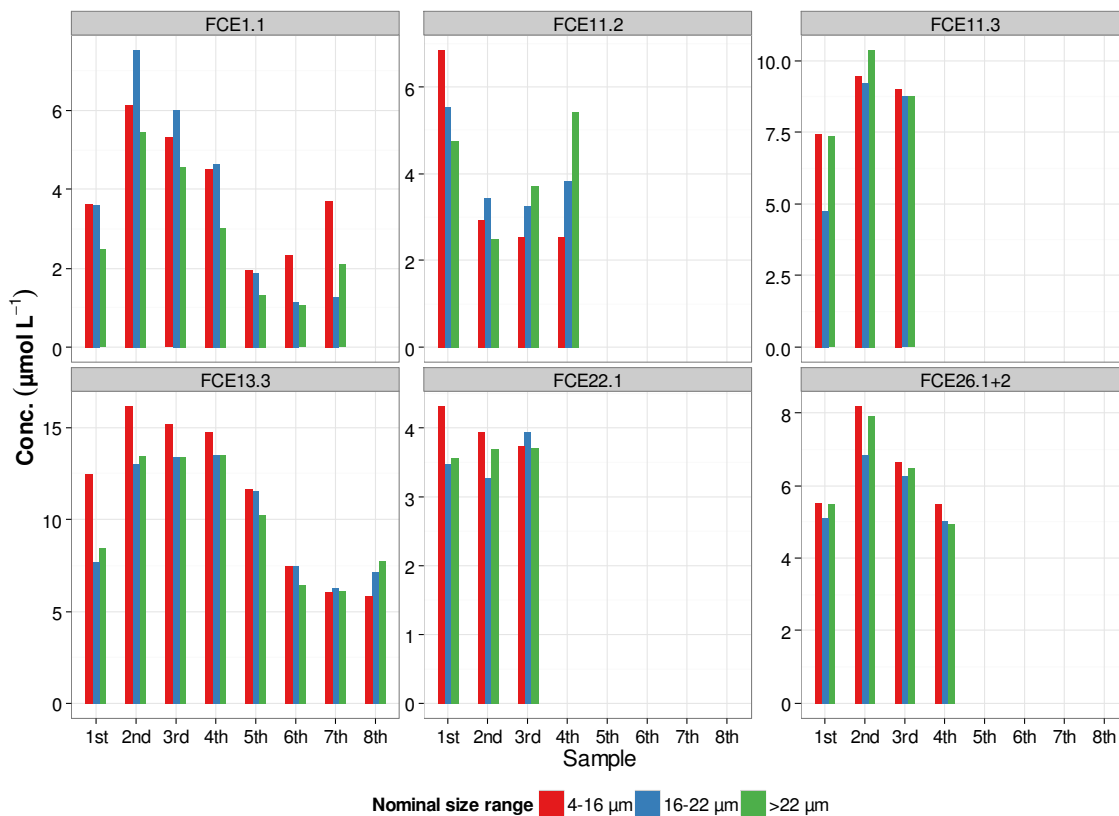

Figure S17: Size-resolved concentrations of  $\text{H}_2\text{O}_2$  (aq) for individual samples from 3-stage cloud water collector.

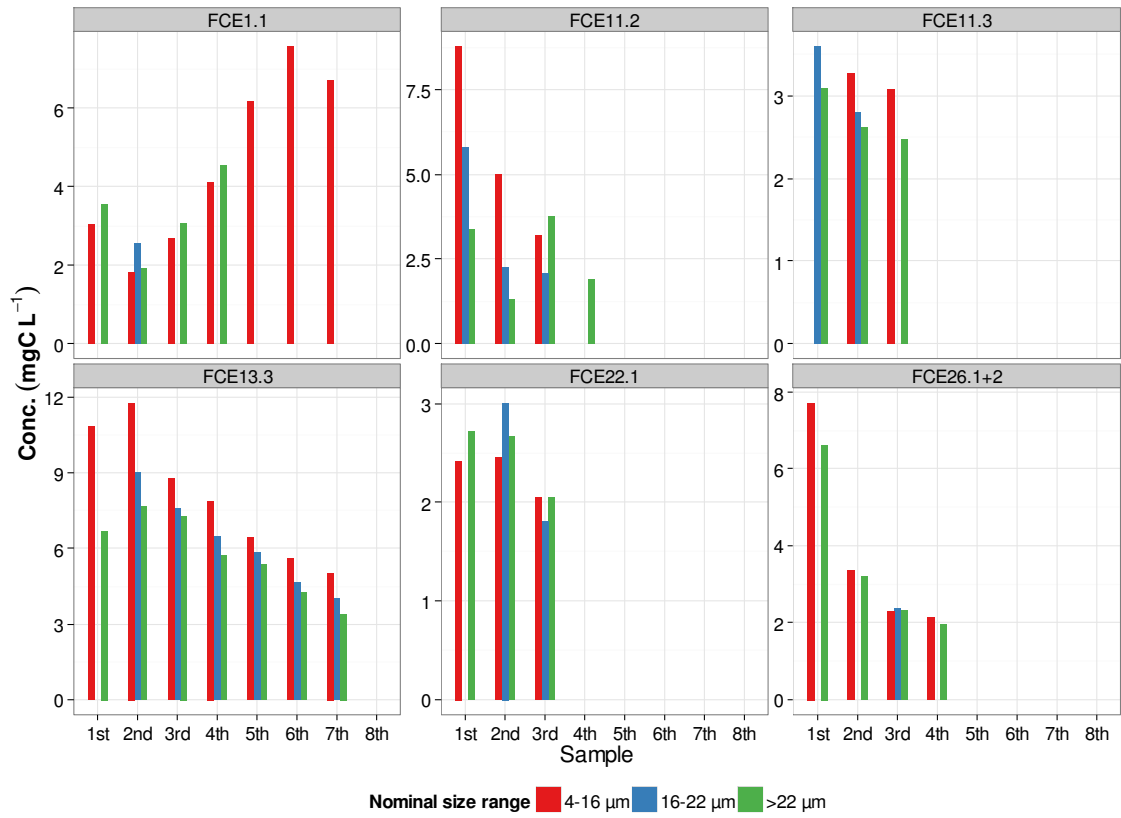

Figure S18: Size-resolved concentrations of DOC for individual samples from 3-stage cloud water collector.

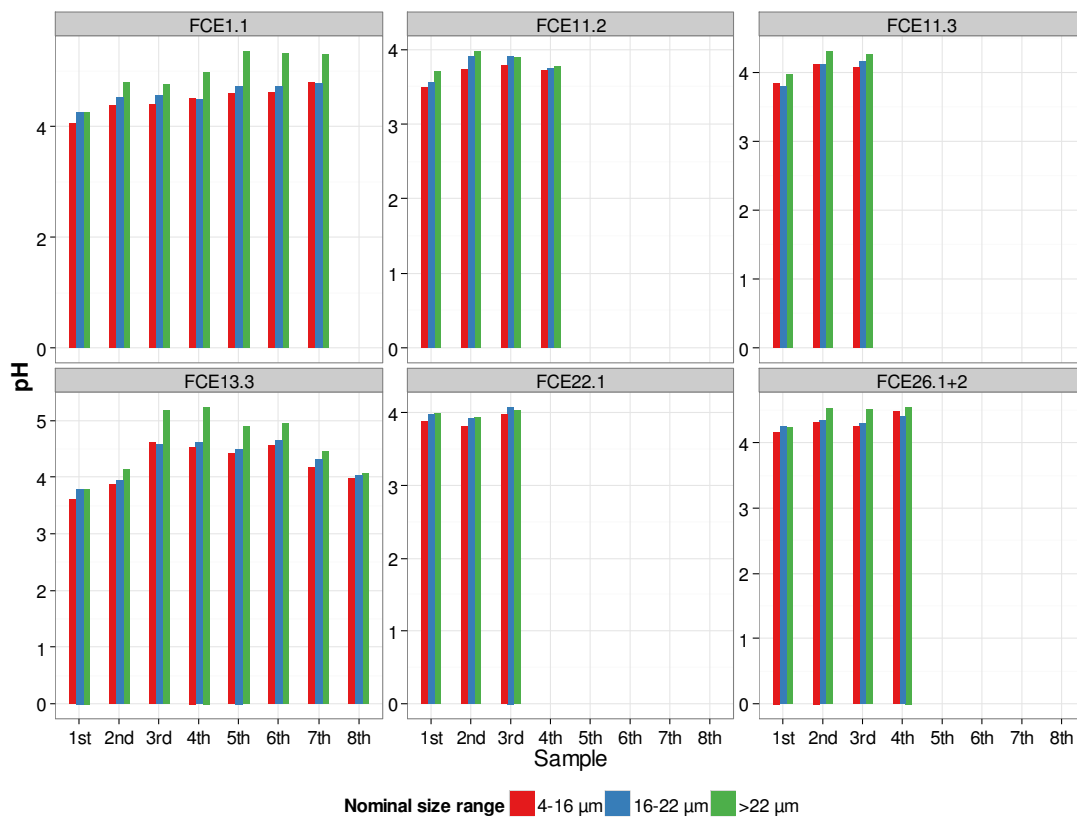

Figure S19: Size-resolved pH values for individual samples from 3-stage cloud water collector.

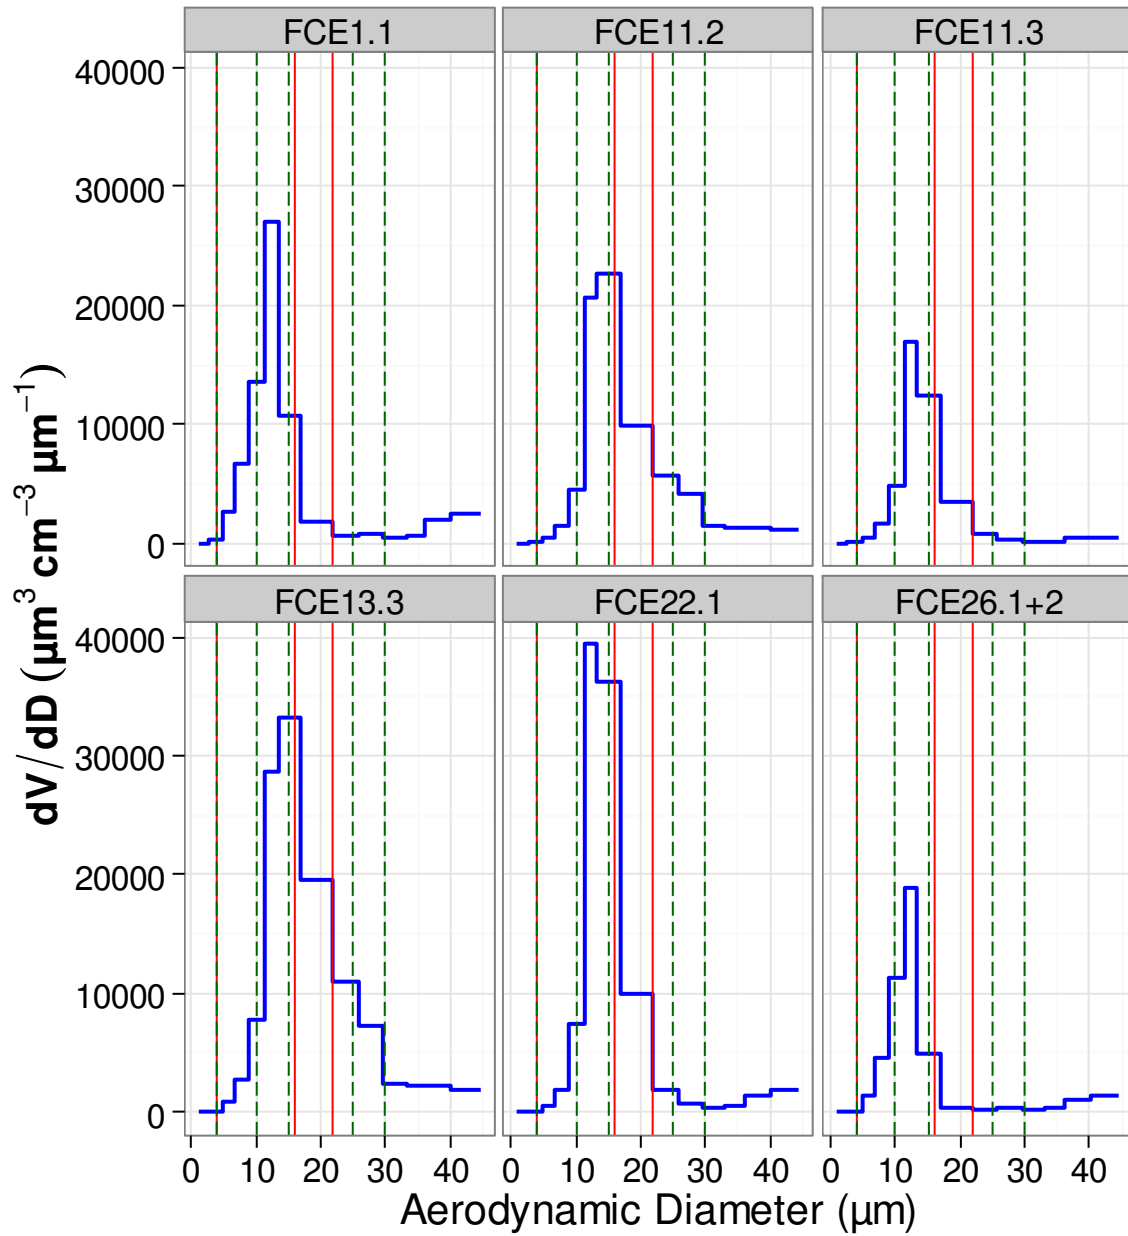

Figure S20: Mean volume size distributions of cloud droplets during main events. Solid red and dashed green lines indicate nominal stage cut-off diameters of 3-stage and 5-stage collector, respectively.



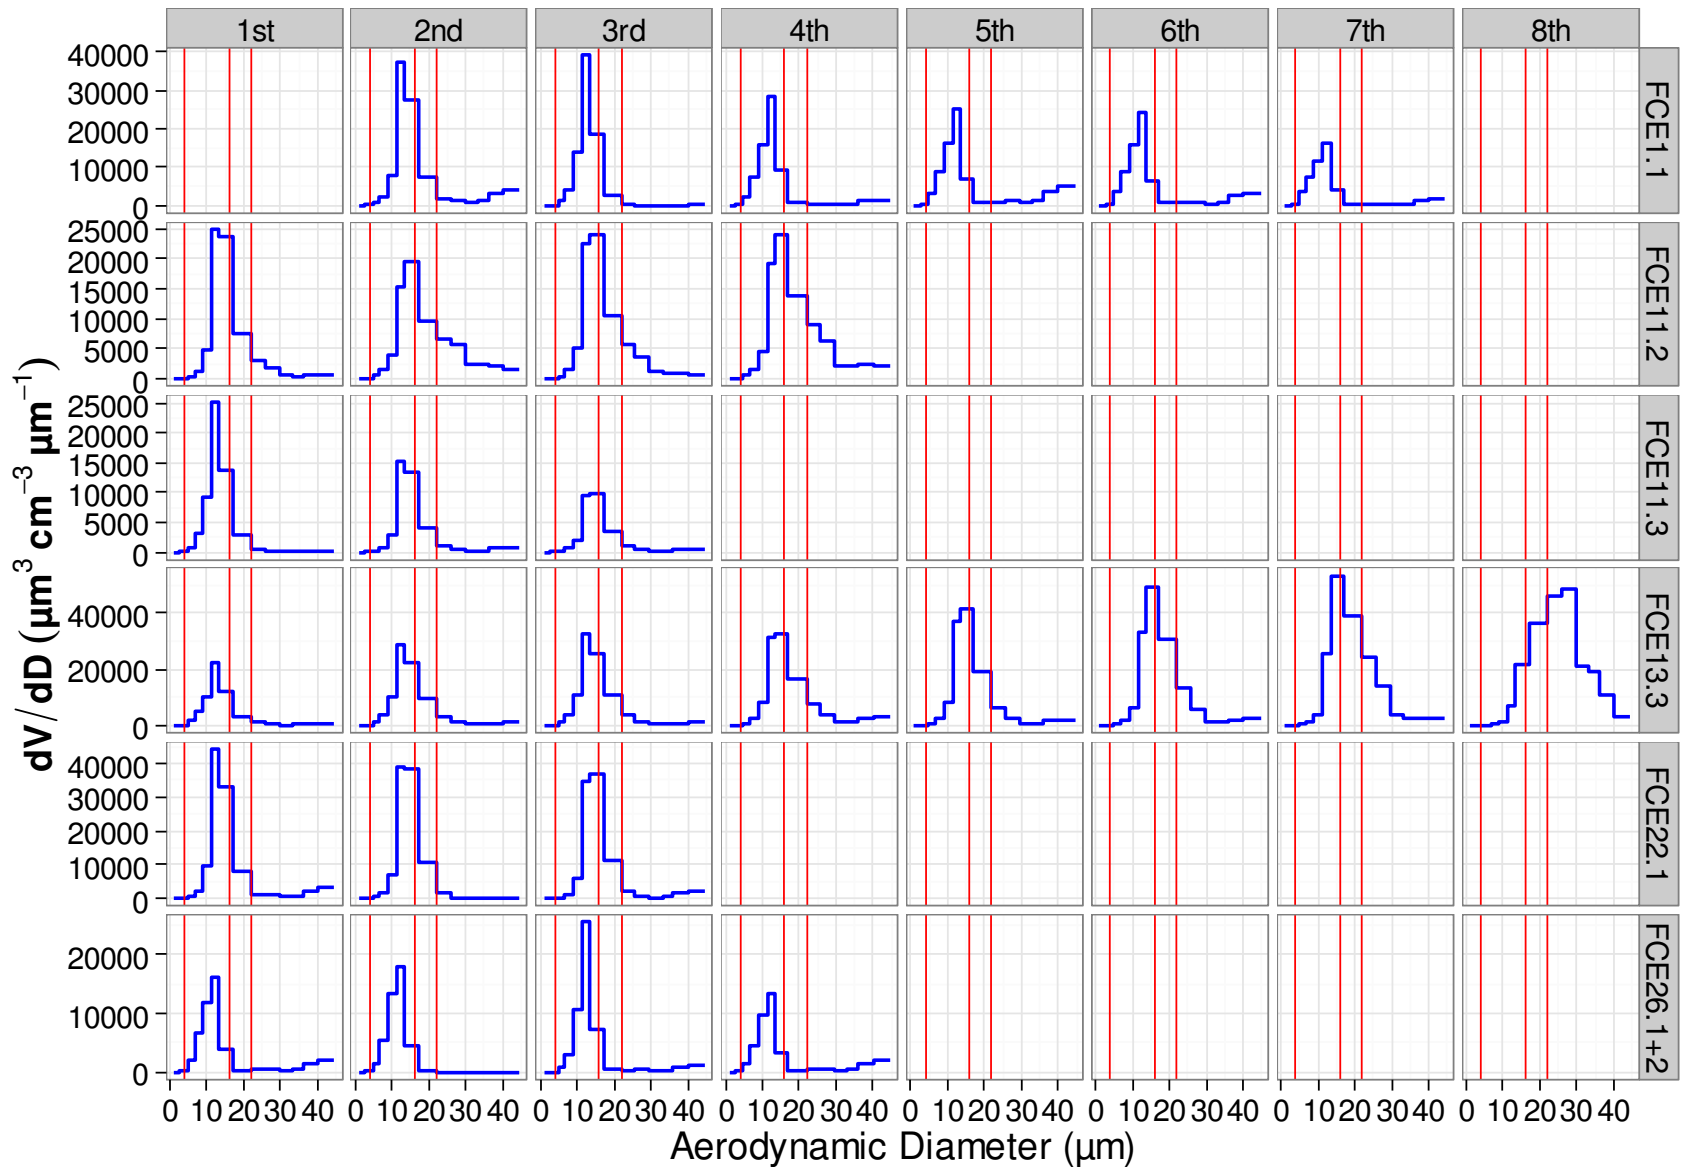

Figure S21: Mean volume size distributions of cloud droplets during individual samples of 3-stage collector. Solid red lines indicate nominal stage cut-off diameters.

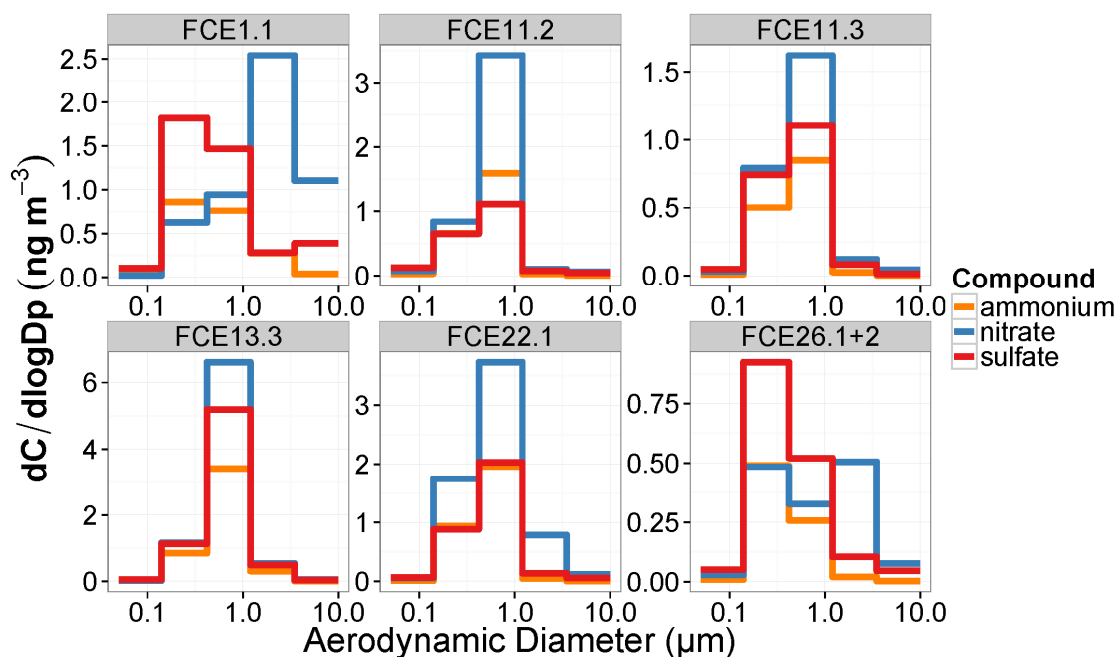

Figure S22: Size distributions of main inorganic ions at upwind site, obtained from 5-stage Berner impactor.

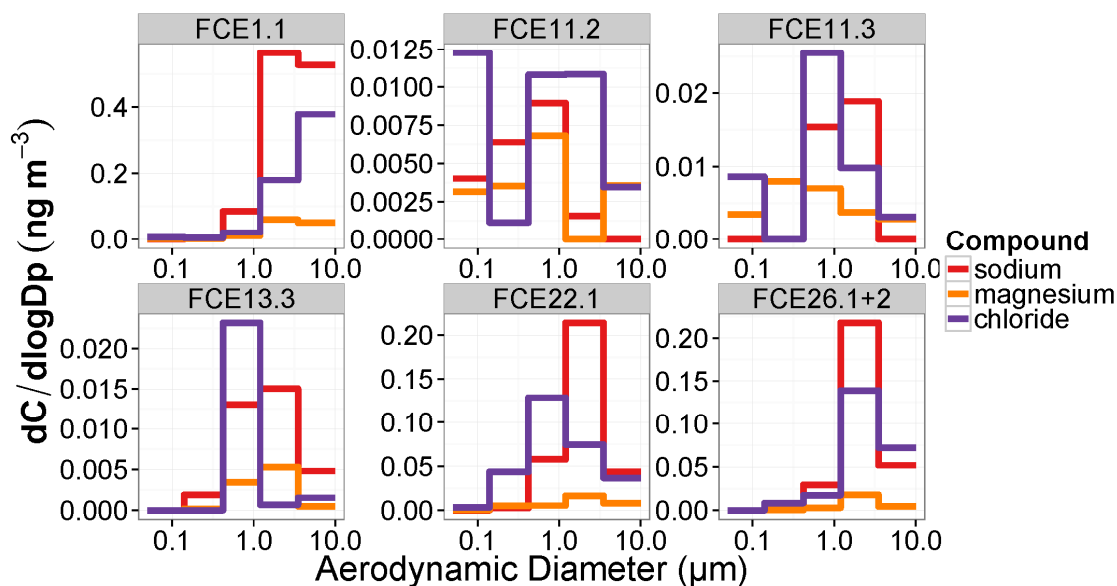

Figure S23: Size distributions of minor inorganic ions at upwind site, obtained from 5-stage Berner impactor.

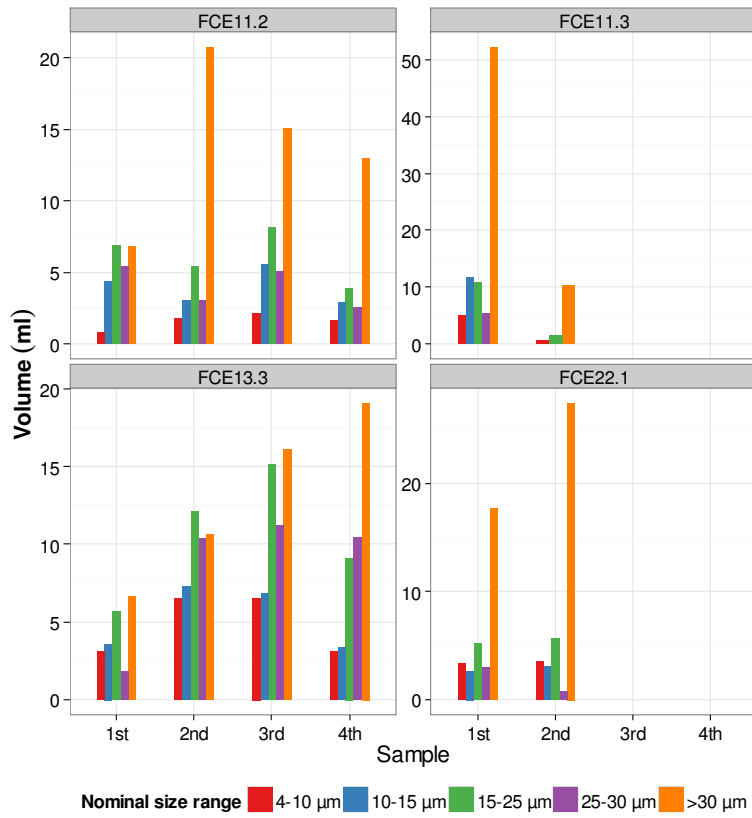

Figure S24: Sampled volumes of cloud water per stage of the 5-stage collector for individual samples.

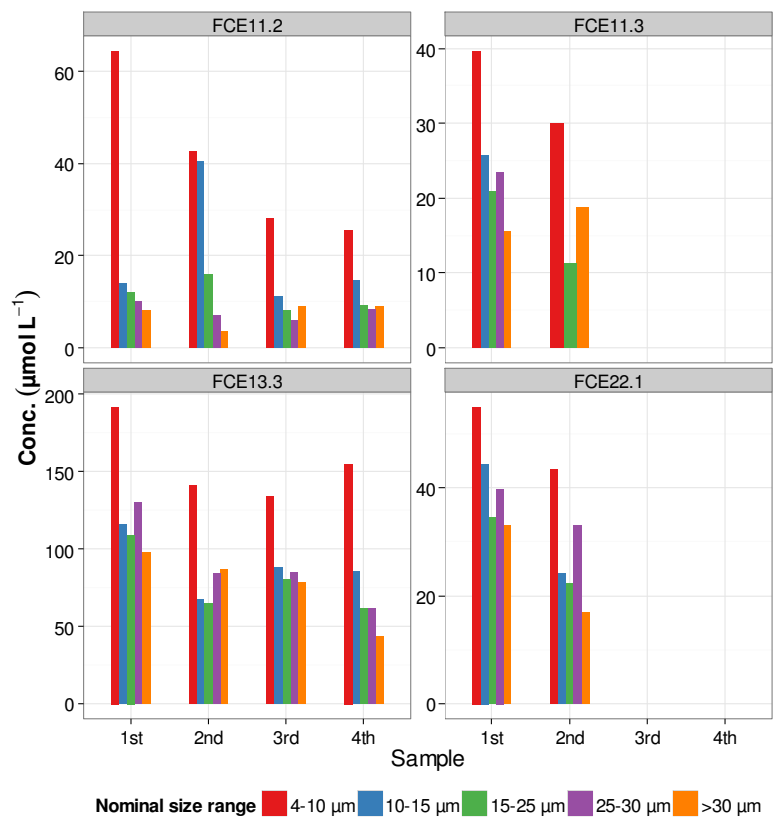

Figure S25: Size-resolved concentrations of sulfate for individual samples from 5-stage cloud water collector.

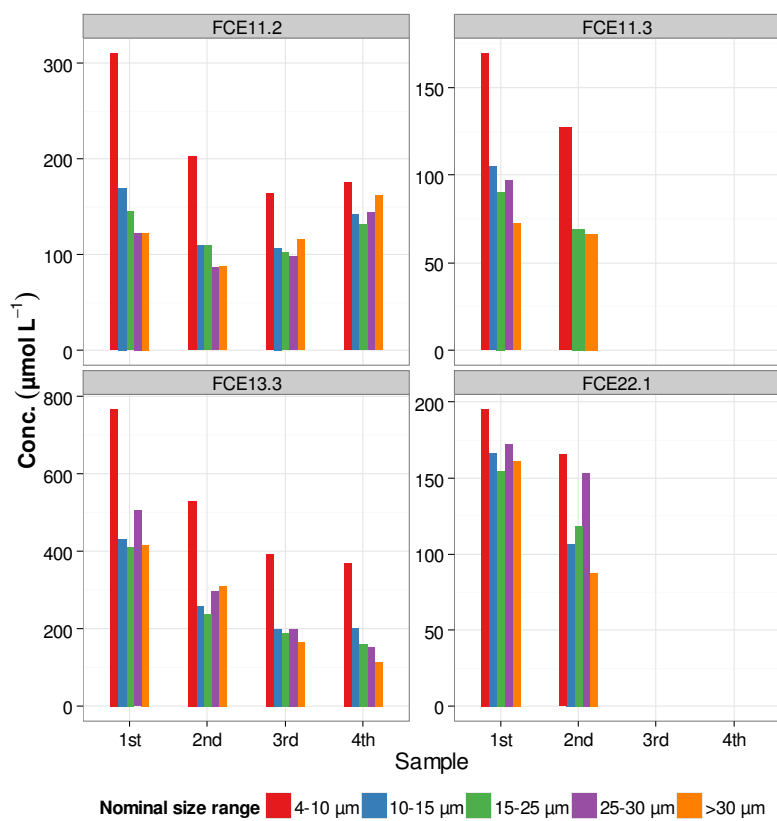

Figure S26: Size-resolved concentrations of nitrate for individual samples from 5-stage cloud water collector.

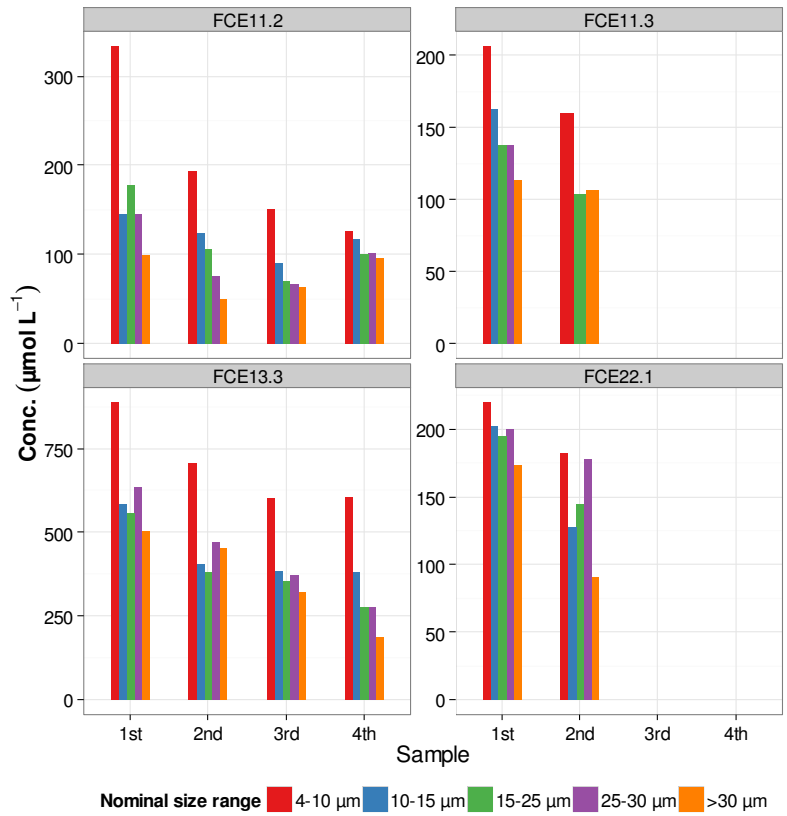

Figure S27: Size-resolved concentrations of ammonium for individual samples from 5-stage cloud water collector.

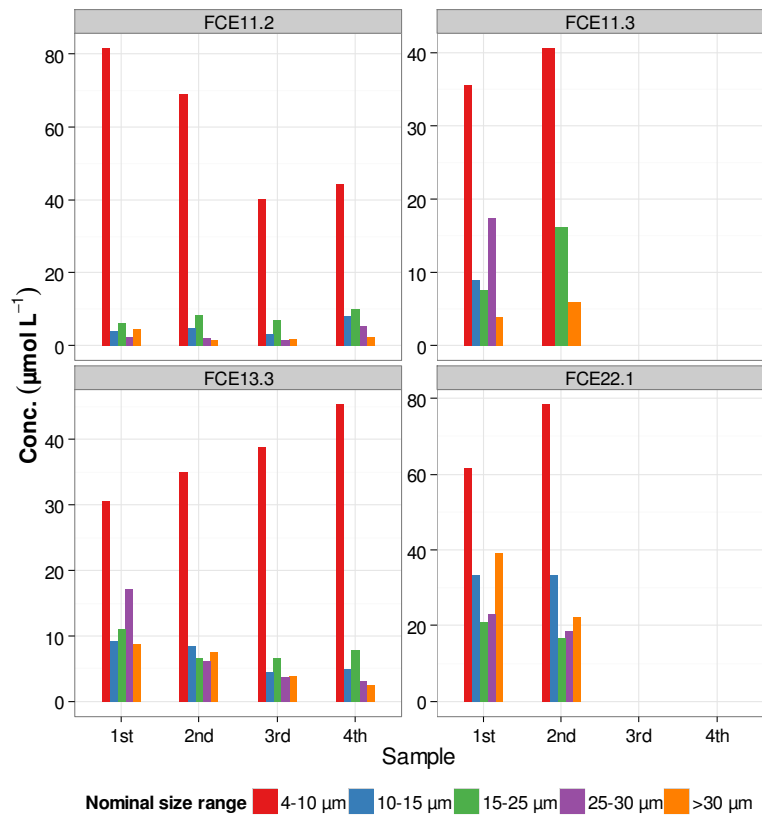

Figure S28: Size-resolved concentrations of chloride for individual samples from 5-stage cloud water collector.

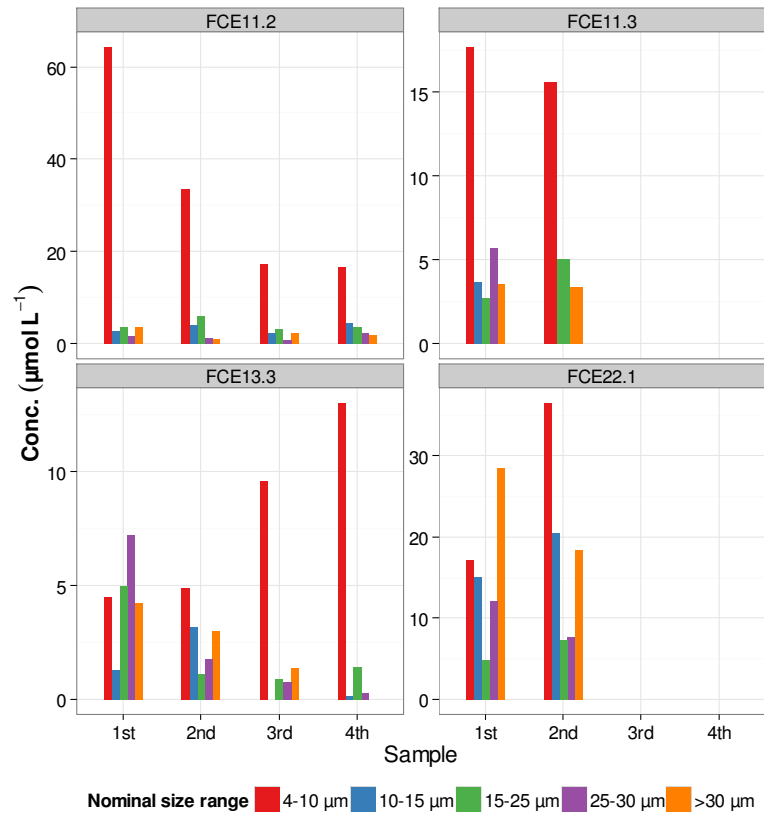

Figure S29: Size-resolved concentrations of sodium for individual samples from 5-stage cloud water collector.

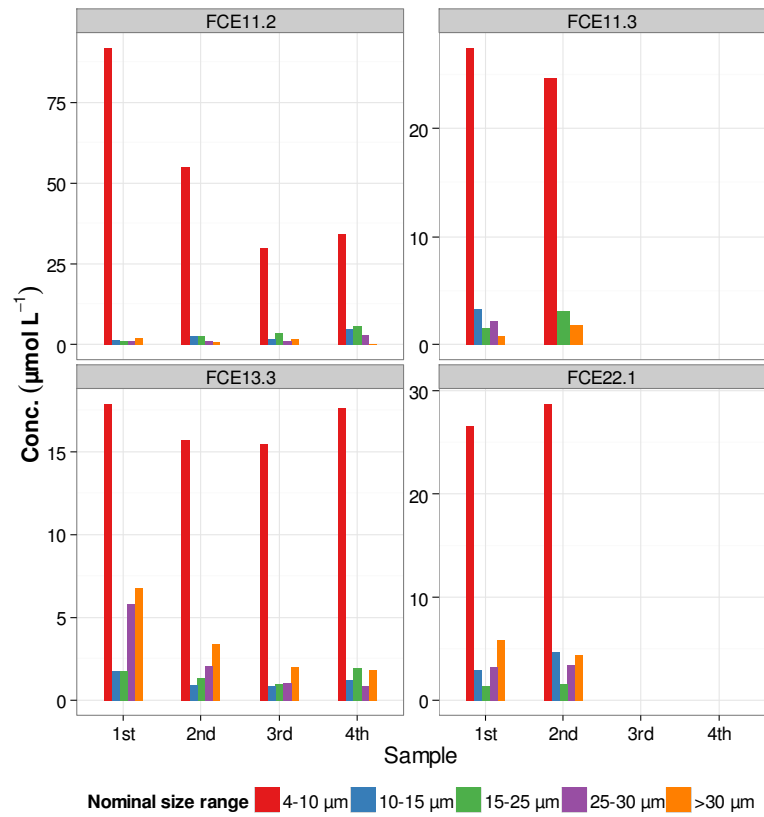

Figure S30: Size-resolved concentrations of magnesium for individual samples from 5-stage cloud water collector.

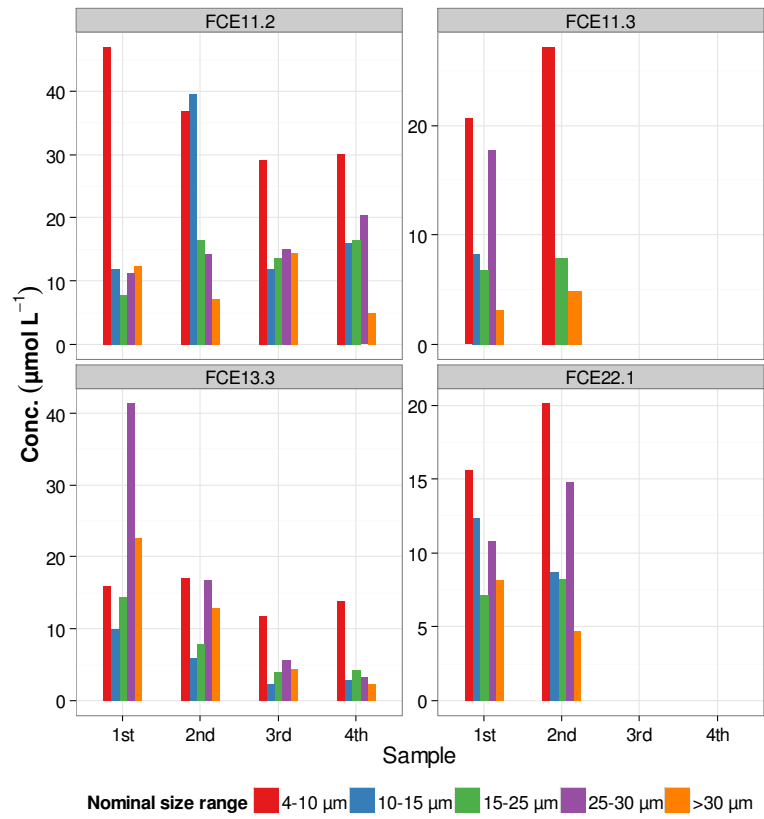

Figure S31: Size-resolved concentrations of calcium for individual samples from 5-stage cloud water collector.

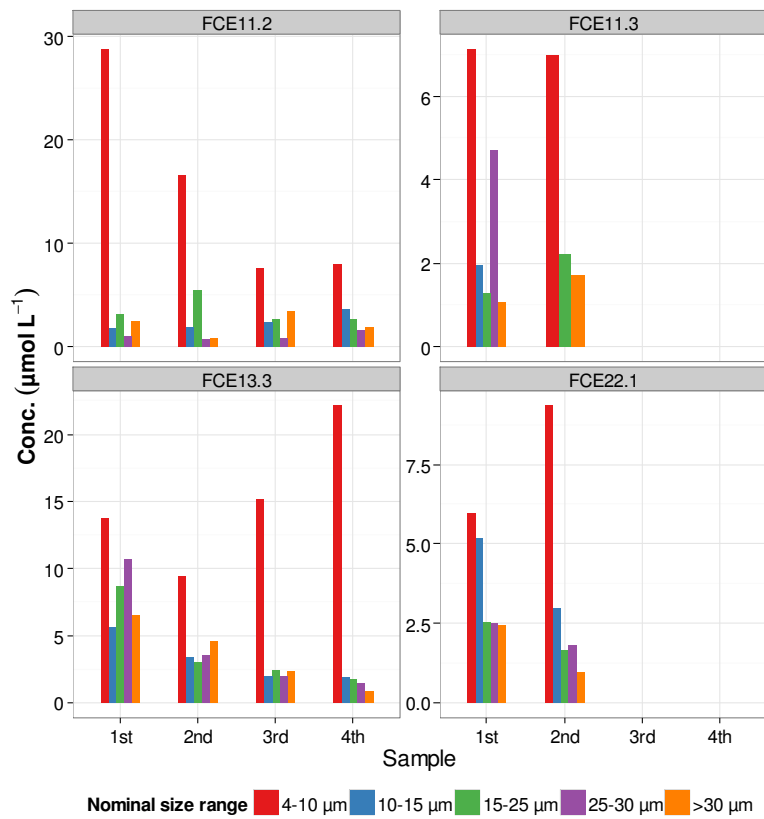

Figure S32: Size-resolved concentrations of potassium for individual samples from 5-stage cloud water collector.

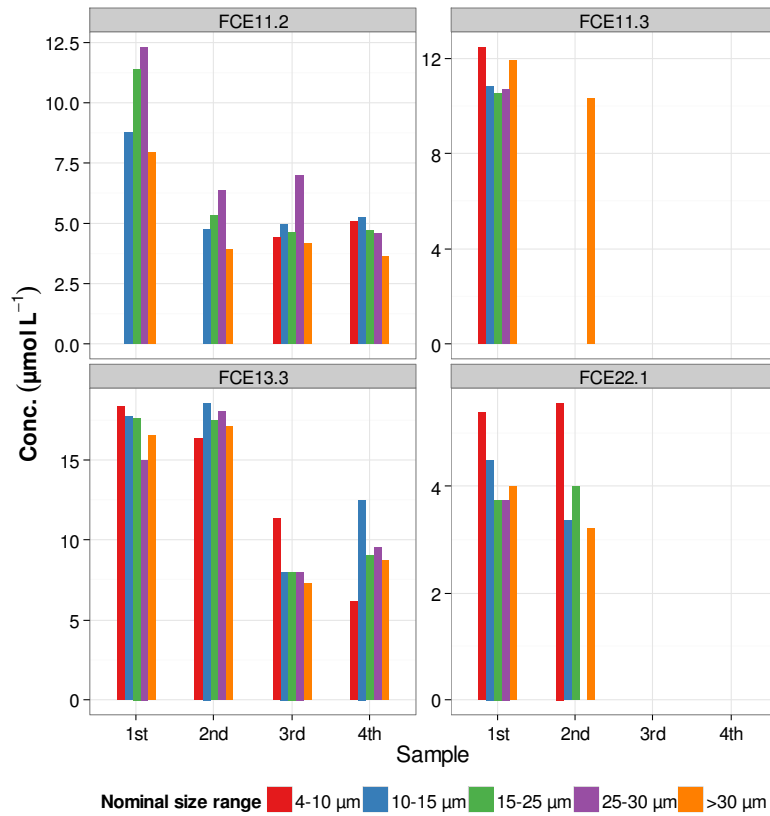

Figure S33: Size-resolved concentrations of  $\text{H}_2\text{O}_2$  (aq) for individual samples from 5-stage cloud water collector.

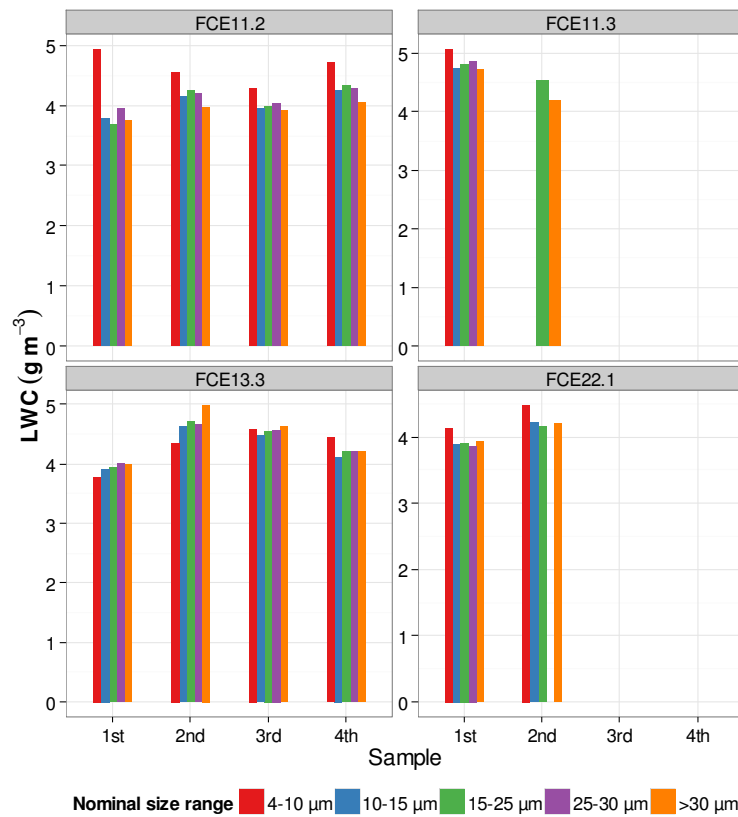

Figure S34: Size-resolved pH values for individual samples from 5-stage cloud water collector.



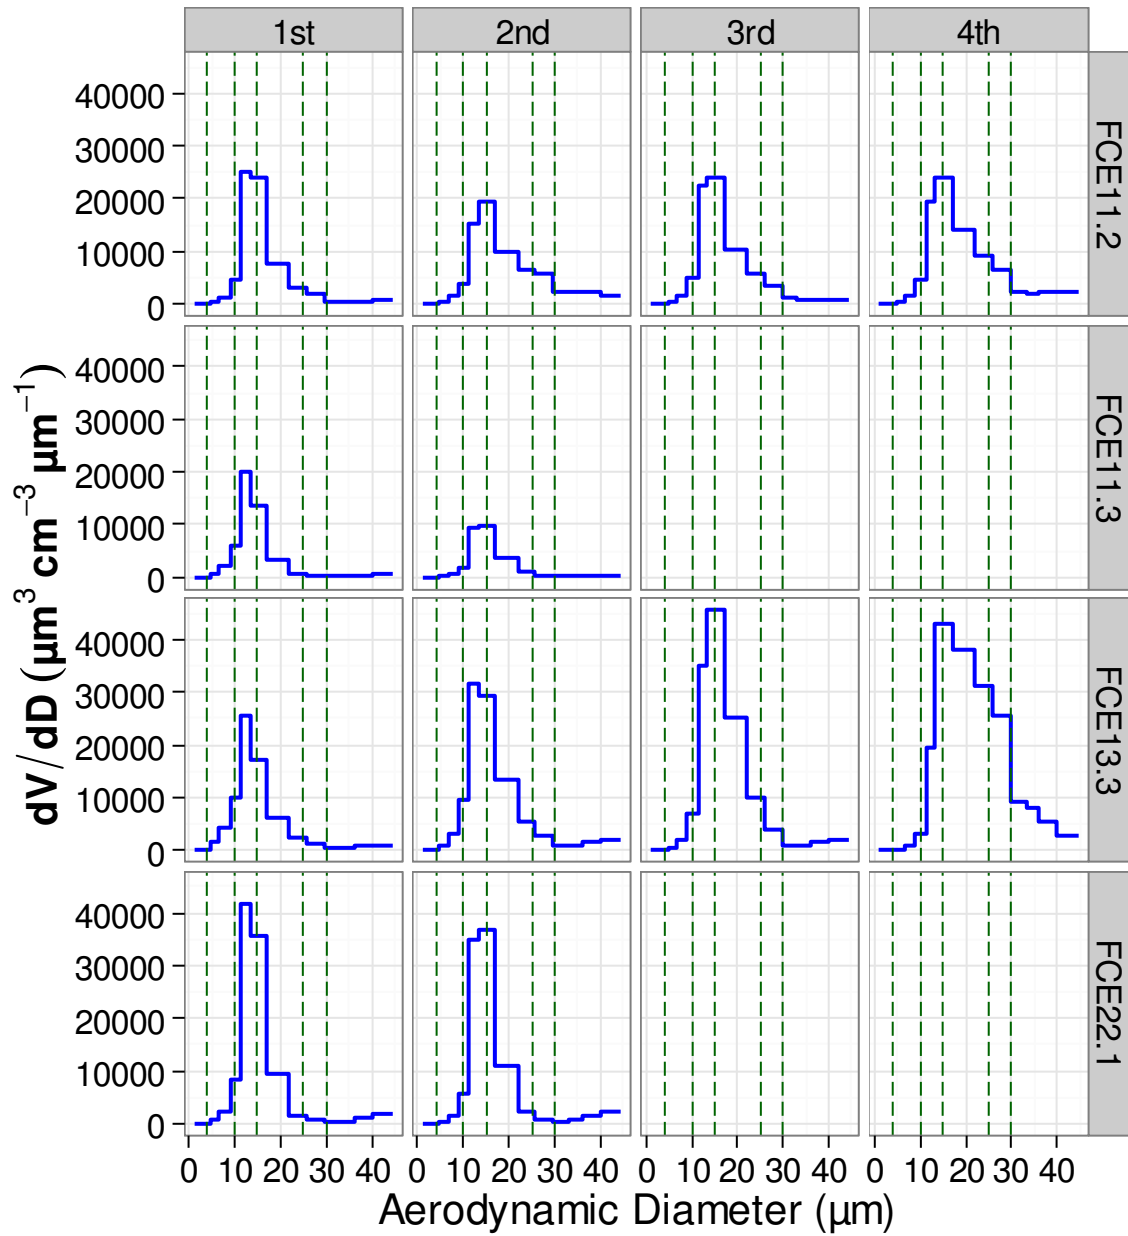

Figure S35: Mean volume size distributions of cloud droplets during individual samples of 5-stage collector. Dashed green lines indicate nominal stage cut-off diameters.
